# Supplementary material for: The Impact of Focused Ultrasound in Two Tumor Models: Temporal Alterations in the Natural History on Tumor Microenvironment and Immune Cell Response
Source: PubMed Central journal article supplement (PMC7072338; doi:10.3390/cancers12020350), 2020-02-04

# Supplementary Materials: The Impact of Focused Ultrasound in Two Tumor Models: Temporal Alterations in the Natural History on Tumor Microenvironment and Immune Cell Response

Gadi Cohen, Parwathy Chandran, Rebecca M. Lorsung, Lauren E. Tomlinson, Maggie Sundby, Scott R. Burks and Joseph A. Frank

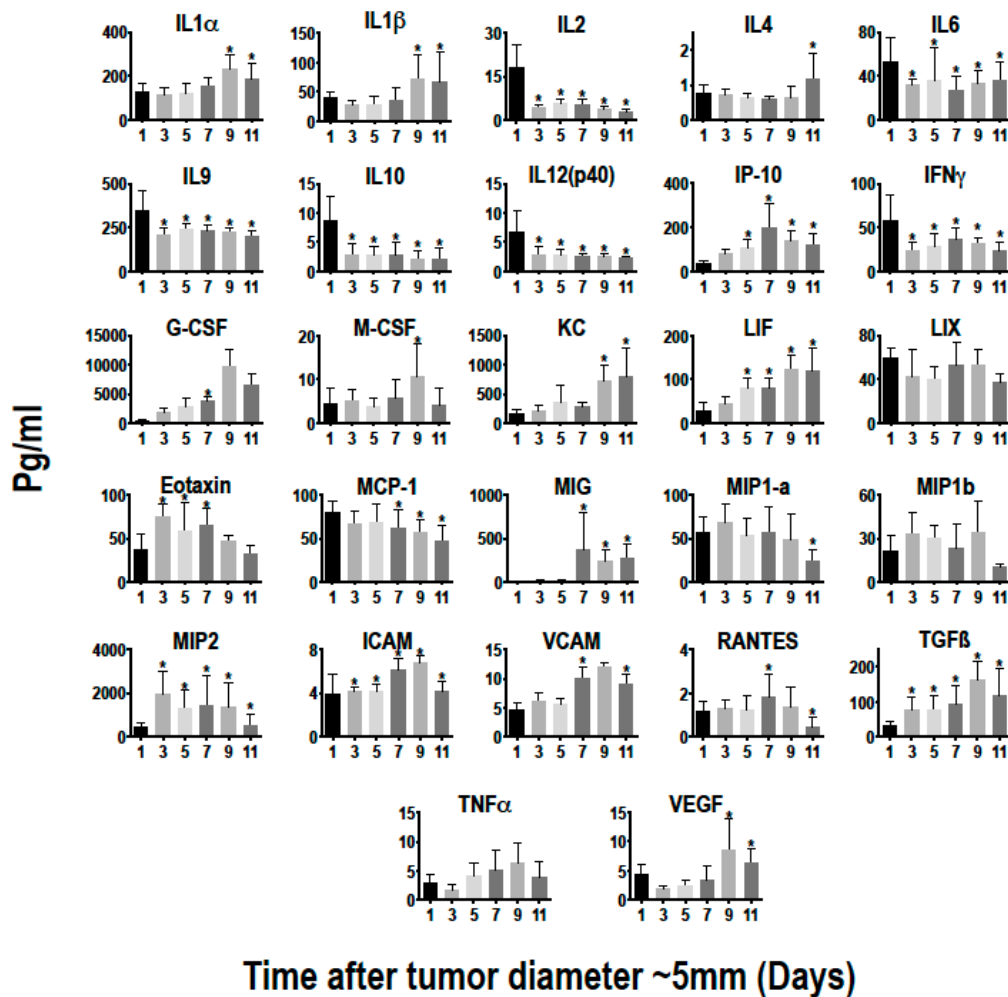

**Figure 1.** Quantitative values of CCTFs over time in mouse xenograft B16 melanoma tumor model. The y axis represents picograms (Pg) per milliliter; the x axis represents days after reaching ~5mm size in diameter. Asterisks indicate statistical significance compare to values detected on day 1 ( $p < 0.05$ ; ANOVA).

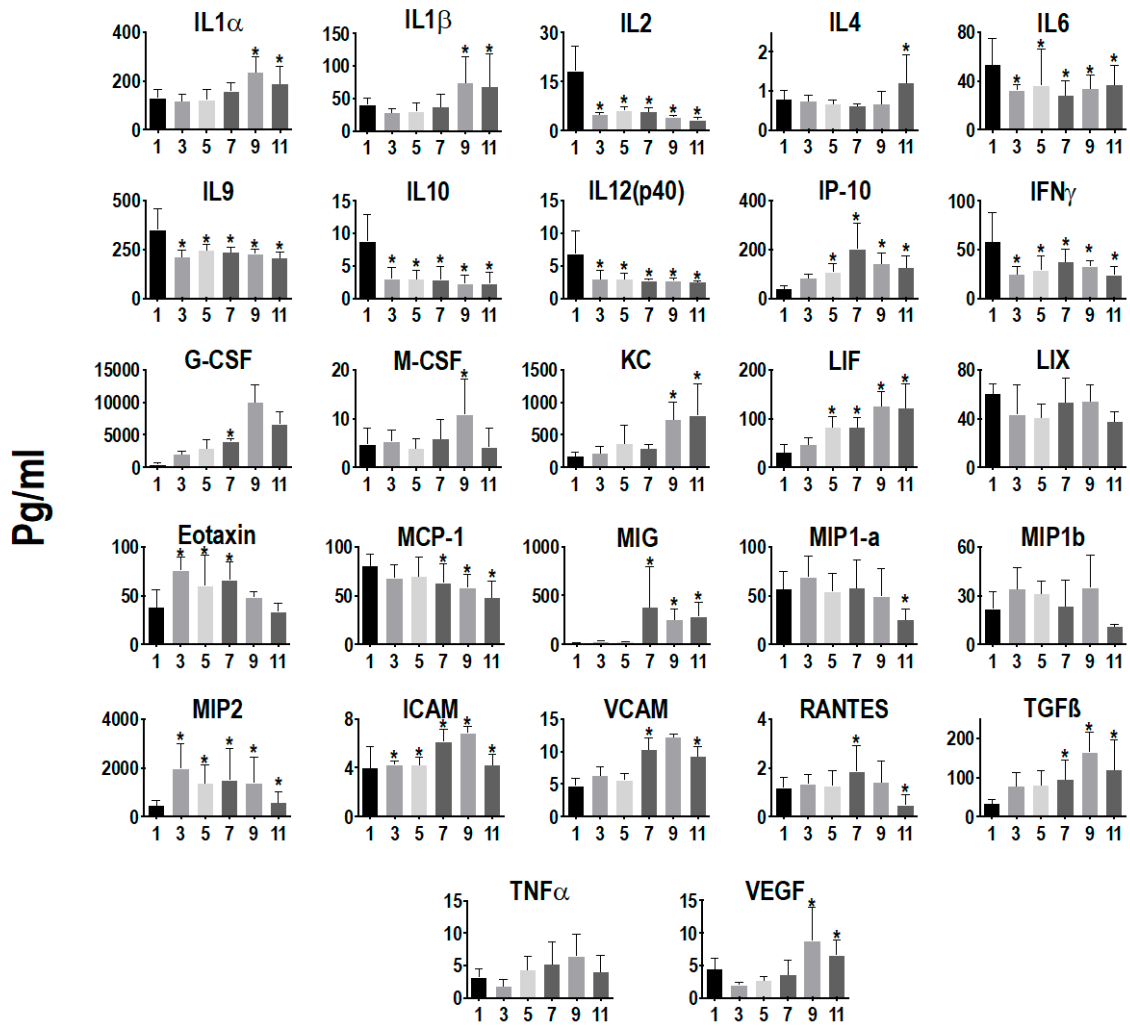

**Time after tumor diameter ~5mm (Days)**

**Figure 2.** Quantitative values of CCTFs over time in mouse xenograft 4T1 breast cancer model. The y axis represents picograms (Pg) per milliliter; the x axis represents days after reaching ~5mm size in diameter. Asterisks indicate statistically significance compare to values detected on day 1 (p < 0.05; ANOVA).

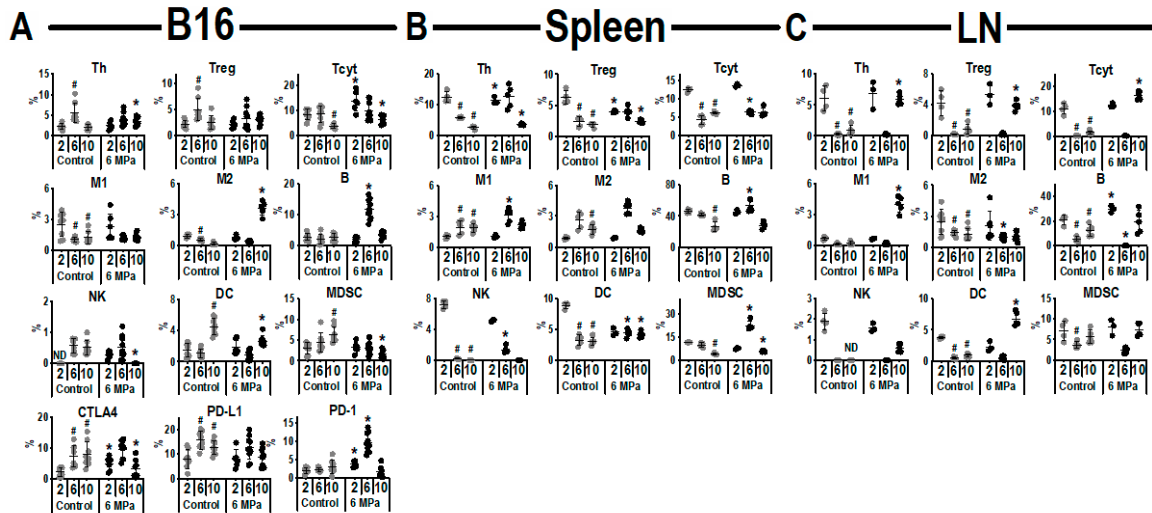

**Figure 3.** Immune cell profiles in B16 melanoma tumor bearing mice 24 hr following pFUS treatment on days 2, 6 or 10. Quantitative values of immune cell profiles over time of mouse B16 tumors (A) their spleens (B) and regional lymph nodes (LN; C), dissected 24 hr post-pFUS treatment. The y axis represents the relationship between each cell population to the total cells detected; the x axis represents 2, 6 or 10 days after reaching ~5mm size in diameter. Asterisks indicate statistically significance ( $p < 0.05$ ; ANOVA) between total cells detected in pFUS-treated mice samples to time-matched controls. Pound indicate statistically significance ( $p < 0.05$ ; ANOVA) between total cells number detected in samples of naïve untreated mice to naïve untreated controls on day 2.

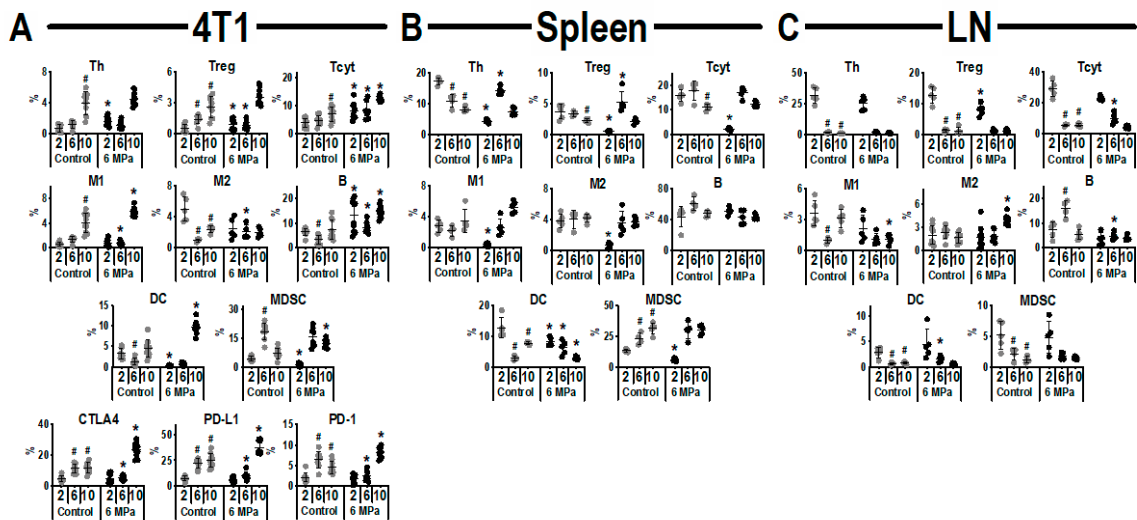

**Figure 4.** Immune cell profiles in 4T1 tumor bearing mice 24 hr following pFUS treatment on days 2, 6 or 10. Quantitative values of immune cell profiles over time of mouse 4T1 tumors (A) their spleens (B) and regional lymph nodes (LN; C), dissected 24 hr post-pFUS treatment. The y axis represents the relationship between each cell population to the total cells detected; the x axis represents 2, 6 or 10 days after reaching ~5mm size in diameter. Asterisks indicate statistically significance ( $p < 0.05$ ; ANOVA) between total cells number detected in samples of pFUS-treated mice to time-matched controls. Pound indicate statistically significance ( $p < 0.05$ ; ANOVA) between total cells number detected in samples of naïve untreated mice to naïve untreated controls on day 2.

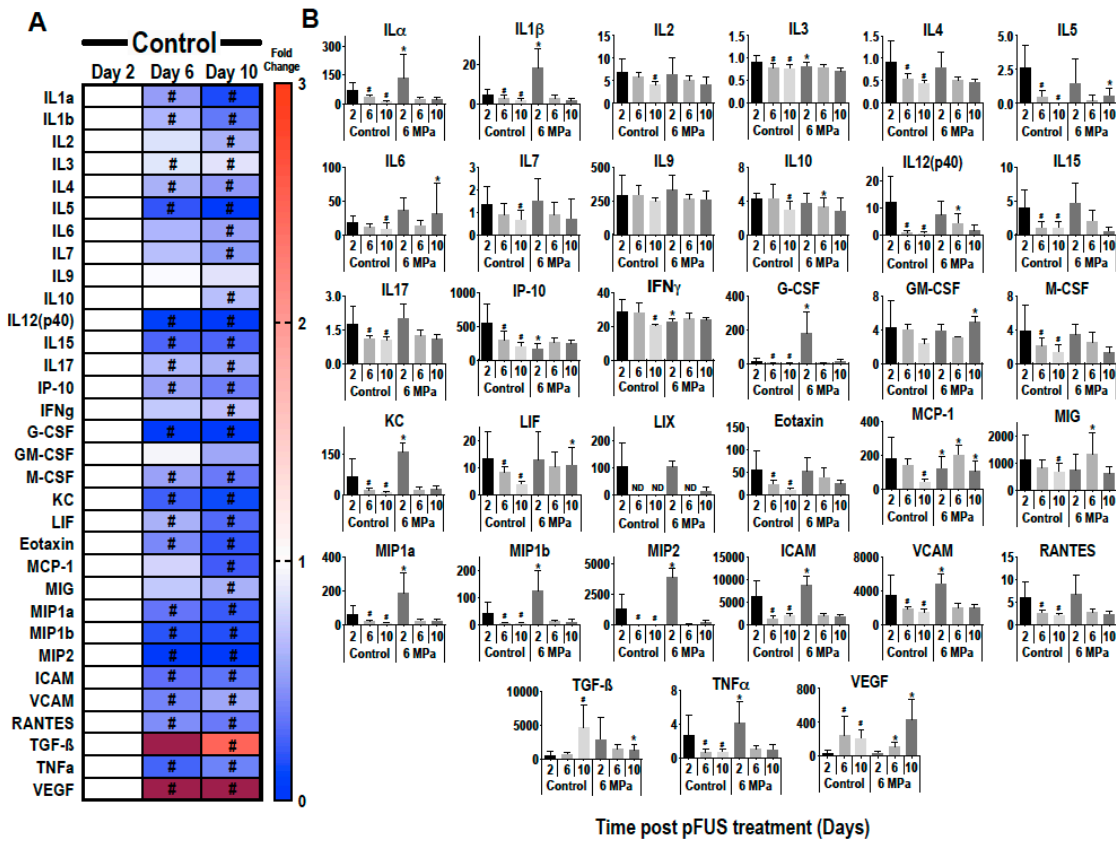

**Figure 5.** Proteomic changes of CCTFs and CAM over time in TME of untreated or pFUS-treated mouse xenograft B16 melanoma. **A.** Heat map demonstrate the normalized changes in CCTFs and CAM to Day 2 tumors un-sonicated B16 tumors compare to tumors on 6 and 10. Blue represent folds change less than 1. Red represent 1-3 folds change. Dark red represent folds change >3.1; **B.** Quantitative values of CCTFs and CAM over time of B16 melanoma tumors dissected 24 hr post sonicating on days 2, 6 or 10. The y axis represents picograms per milliliter; the x axis represents days after reaching ~5mm size in diameter. Asterisks indicate statistical significance (p < 0.05; ANOVA) between values detected in pFUS-treated tumors to time-matched controls. # indicate statistical significance (p < 0.05; ANOVA) between values detected in untreated tumors of naïve mice to naïve untreated controls on day 2.

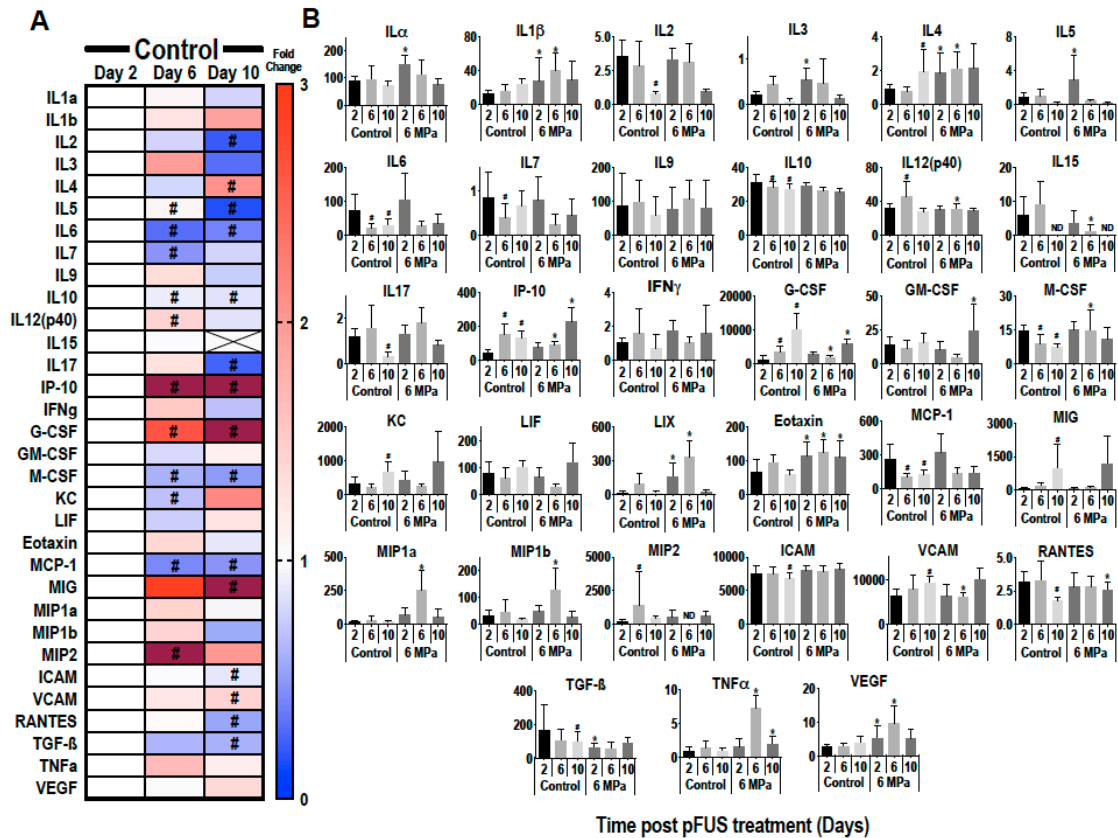

**Figure 6.** Proteomic changes of CCTFs and CAM over time in TME of untreated or pFUS-treated mouse xenograft 4T1 breast cancer. **A.** Heat map demonstrate the normalized changes in CCTFs and CAM to Day 2 tumors unsonicated 4T1 tumors compare to tumors on 6 and 10. Blue represent folds change less than 1. Red represent 1-3 folds change. Dark red represent folds change >3.1; **B.** Quantitative values of CCTFs over time of 4T1 breast cancer samples dissected 24 hr post sonicating on days 2, 6 or 10. The y axis represents picograms per milliliter; the x axis represents days after reaching ~5mm size in diameter. Asterisks indicate statistically significance (p < 0.05; ANOVA) between values detected in pFUS-treated tumors to time-matched controls. # indicate statistically significance (p < 0.05; ANOVA) between values detected in untreated tumors of naive mice to naive untreated controls on day 2.

**Table 1.** Detailed list of antibodies.

| Item                                                  | Cat#   | Clone    | Working Conc. (µg/10 <sup>6</sup> cells in 100 µl) | Isotype control                                     | Cat#   | Company    | Clone   |
|-------------------------------------------------------|--------|----------|----------------------------------------------------|-----------------------------------------------------|--------|------------|---------|
| FITC anti-mouse CD3 Antibody                          | 100204 | 17A2     | 1                                                  | FITC Rat IgG2b, κ Isotype Ctrl Antibody             | 400606 | Biological | RTK4530 |
| APC anti-mouse CD4 Antibody                           | 100516 | RM4-5    | 0.25                                               | APC Rat IgG2a, κ Isotype Ctrl Antibody              | 400512 | Biological | RTK2738 |
| PE anti-mouse CD25 Antibody                           | 102008 | PC61     | 1                                                  | PE Rat IgG1, λ Isotype Ctrl Antibody                | 401906 | Biological | GD114F7 |
| PE anti-mouse CD8a Antibody                           | 100708 | 53-6.7   | 0.25                                               | PE Rat IgG2a, κ Isotype Ctrl Antibody               | 400508 | Biological | RTK2738 |
| FITC anti-mouse F4/80 Antibody                        | 123108 | BM8      | 0.25                                               | FITC Rat IgG2a, κ Isotype Ctrl Antibody             | 400506 | Biological | RTK2738 |
| PE anti-mouse CD206 (MMR) Antibody                    | 141706 | CD68C2   | 0.5                                                | PE Rat IgG2a, κ Isotype Ctrl Antibody               | 400508 | Biological | RTK2738 |
| APC anti-mouse CD86 Antibody                          | 105012 | GL-1     | 0.25                                               | APC Rat IgG2a, κ Isotype Ctrl Antibody              | 400512 | Biological | RTK2738 |
| Alexa Fluor® 488 anti-mouse/human CD45R/E220 Antibody | 103225 | RA3-6B2  | 2                                                  | Alexa Fluor® 488 Rat IgG2a, κ Isotype Ctrl Antibody | 400525 | Biological | RTK2738 |
| Alexa Fluor® 647 anti-mouse CD335 (Nkp46) Antibody    | 137628 | 29A1.4   | 0.5                                                | Alexa Fluor® 647 Rat IgG2a, κ Isotype Ctrl Antibody | 400526 | Biological | RTK2738 |
| FITC anti-mouse CD45 Antibody                         | 103108 | 3D-F11   | 0.25                                               | FITC Rat IgG2b, κ Isotype Ctrl Antibody             | 400606 | Biological | RTK4530 |
| PE anti-mouse/human CD11b Antibody                    | 101208 | M1/70    | 0.25                                               | PE Rat IgG2b, κ Isotype Ctrl Antibody               | 400608 | Biological | RTK4530 |
| APC anti-mouse Ly-6G/Ly-6C (Gr-1) Antibody            | 108412 | RB6-8C5  | 0.25                                               | APC anti-mouse Ly-6G/Ly-6C (Gr-1) Antibody          | 108412 | Biological | RB6-8C5 |
| PE anti-mouse CD11c Antibody                          | 117308 | N418     | 0.25                                               | PE American Hamster IgG Isotype Ctrl Antibody       | 400908 | Biological | HTK388  |
| APC anti-mouse CD152 (CTLA-4) Antibody                | 106310 | UC10-4B9 | 1                                                  | PE American Hamster IgG Isotype Ctrl Antibody       | 400912 | Biological | HTK388  |
| PE anti-mouse CD274 (B7-H1, PD-L1) Antibody           | 124308 | 10F-9G2  | 0.25                                               | PE Rat IgG2b, κ Isotype Ctrl Antibody               | 400608 | Biological | RTK4530 |
| Alexa Fluor® 647 anti-mouse CD279 (PD-1) Antibody     | 135230 | 29F-1A12 | 0.25                                               | Alexa Fluor® 647 Rat IgG2a, κ Isotype Ctrl Antibody | 400526 | Biological | RTK2738 |

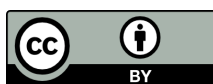

Supplement: cancers-12-00350-s001.pdf [file cancers-12-00350-s001.pdf]
